# Supplementary material for: Antifungal activity and mechanisms of AgNPs and their combination with azoxystrobin against Magnaporthe oryzae
Source: Royal Society of Chemistry journal article supplement (doi:10.1039/d3en00168g), 2023-01-01
Supplement: d3en00168g1.pdf [file d3en00168g1.pdf]

### Supplemental data

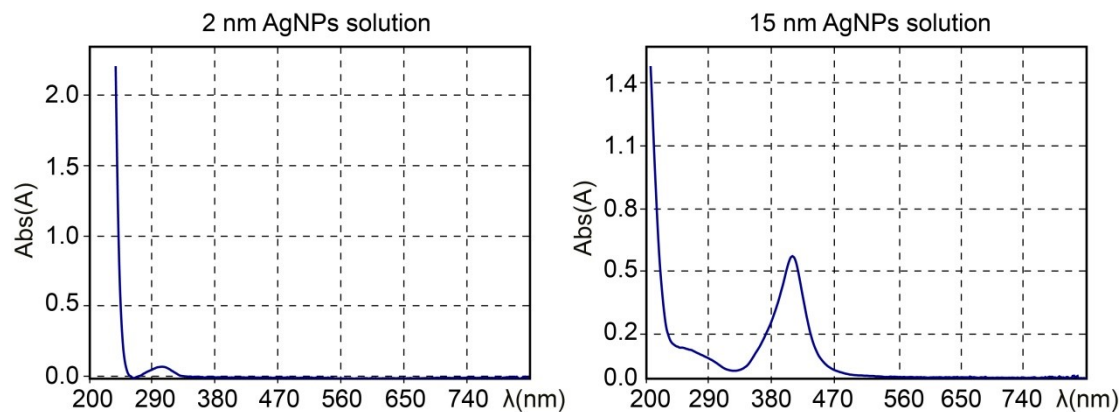

**Figure S1.** UV-vis absorption spectra of 2 and 15 nm AgNPs used in the study.

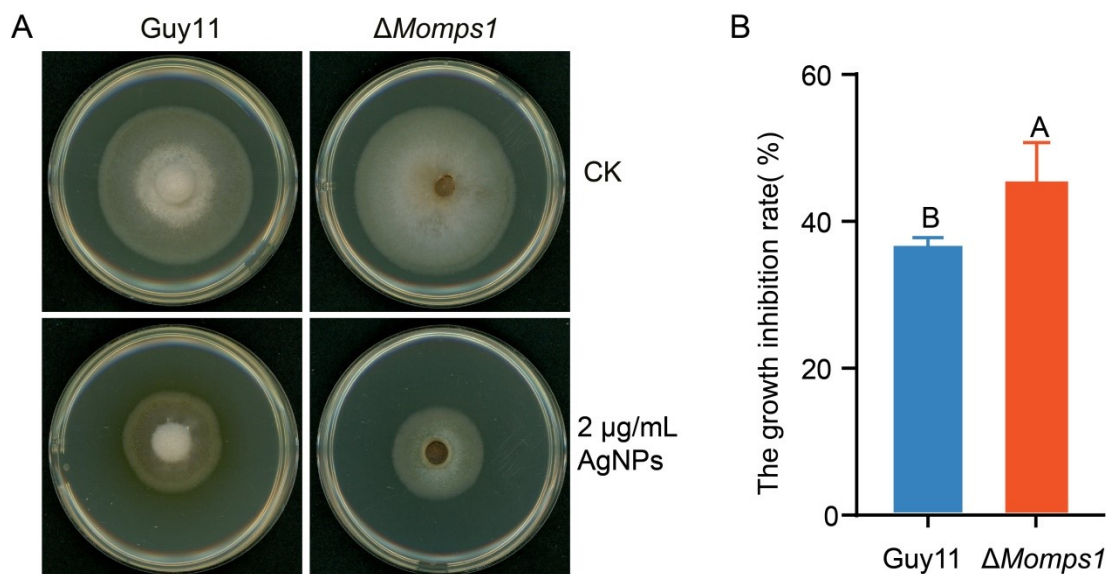

**Figure S2.** The  $\Delta Momp1$  is more sensitive to AgNPs than the WT. A. The colonies of  $\Delta Momp1$  and the WT strain Guy11 when grown on CM supplemented with 2 μg/mL AgNPs. Photographs were taken at 6 dpi. B. The relative growth inhibitory rates of the  $\Delta Momp1$  and Guy11 strains on CM plates amended with AgNPs.

A

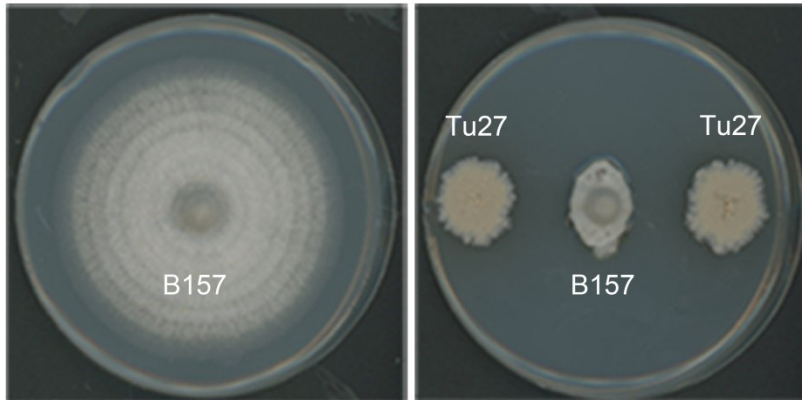

B

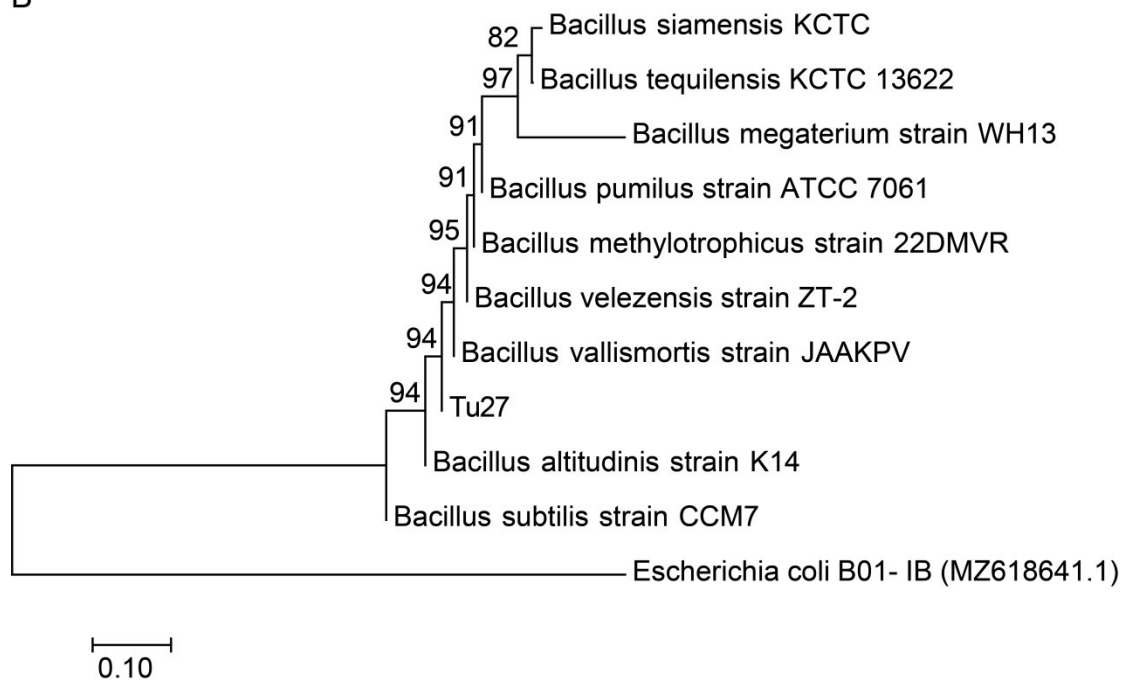

**Figure S3. Isolation and characterization of Tu27.** A. The strain Tu27 isolated from rice rhizosphere soil had an antagonistic effect on *M. oryzae*. The strain Tu27 was cultured with *M. oryzae* strain B157 in confrontation on CM plate. B. Phylogenetic analysis of Tu27. The phylogenetic tree was constructed using the neighbor-joining method with 16s rRNA gene sequences by the software Mega 7.0 with the bootstrap test of 1000 replicates.

**Table S1 Primers used in this study.**

**Table S2 Sensitivities determination of different *M. oryzae* field isolates strains to AgNPs.**
