# Supplementary material for: Antifungal activity and mechanisms of AgNPs and their combination with azoxystrobin against Magnaporthe oryzae
Source: Royal Society of Chemistry journal article supplement (doi:10.1039/d3en00168g), 2023-01-01
Supplement: d3en00168g2.xlsx [file d3en00168g2.xlsx]

## Sheet: Table S1
Table S1 Primers used in this study
Primer	Sequence (5’-3’)	Application
63F	CAGGCCTAACACATGCAAGTC	Amplication of 16S rRNA gene sequence
1387R	GGGCGGTGATGTACAAGGC

## Sheet: Table S2
Table S2 Sensitivities determination for different M. oryzae field isolates (MoFI) strains to AgNPs
Strain	Fit curve equations	EC50(μg/mL)
MoFI-1	y = 19.345x - 7.1429	2.95388
MoFI-2	y = 18.461x - 7.4228	3.11049
MoFI-3	y = 20.726x - 10.194	2.90427
MoFI-4	y = 20.598x - 11.229	2.97257
MoFI-5	y = 19.181x - 6.1988	2.92992
MoFI-6	y = 18.481x - 10.726	3.28586
MoFI-7	y = 18.588x - 6.4495	3.03688
MoFI-8	y = 18.797x - 7.6995	3.06961
MoFI-9	y = 19.948x - 4.0893	2.71151
MoFI-10	y = 20.927x - 12.119	2.96837
MoFI-11	y = 19.296x - 8.3197	3.02237
MoFI-12	y = 20.591x - 13.424	3.08018
MoFI-13	y = 20.868x - 7.1352	2.73793
MoFI-14	y = 20.003x - 9.0069	2.9499
